# Supplementary material for: Mapping Research Conducted on Long-Term Care Facilities for Older People in Brazil: A Scoping Review
Source: MDPI journal article supplement (doi:10.3390/ijerph18041522), 2021-02-05
Supplement: s1 [file s1]

**Table S1.** Main topics areas of scientific peer-reviewed research conducted in Brazilian long-term care facilities, grouped into three categories.

| <b>Resident Outcomes</b>             | <b>Total<br/><i>n</i></b> | <b>Staff and Family Support</b>  | <b>Total<br/><i>n</i></b> | <b>LTCF Characteristics</b> | <b>Total<br/><i>n</i></b> |
|--------------------------------------|---------------------------|----------------------------------|---------------------------|-----------------------------|---------------------------|
| Functional capacity                  | 36                        | Views about care                 | 18                        | Organizational context      | 12                        |
| Mental Health                        | 30                        | Family functionality             | 6                         | Policies                    | 6                         |
| Nutrition                            | 26                        | Work condition                   | 4                         |                             |                           |
| Balance/Falls/Fractures              | 22                        | Occupational health              | 3                         |                             |                           |
| Pharmacotherapy                      | 21                        | Views about patients' conditions | 2                         |                             |                           |
| Perceptions/Experiences              | 19                        | End of life                      | 2                         |                             |                           |
| Oral Health                          | 17                        | Staff profile                    | 2                         |                             |                           |
| Assessment/ Profile                  | 17                        | Work condition                   | 1                         |                             |                           |
| Frailty                              | 10                        | Spirituality                     | 1                         |                             |                           |
| Reasons for LTCF admission           | 9                         | Occupational health              | 1                         |                             |                           |
| Infection                            | 8                         | Social support                   | 1                         |                             |                           |
| Urinary Incontinence                 | 7                         |                                  |                           |                             |                           |
| Quality of life                      | 6                         |                                  |                           |                             |                           |
| Ulcers                               | 4                         |                                  |                           |                             |                           |
| Pain                                 | 4                         |                                  |                           |                             |                           |
| Leasure Time/Recreational activities | 4                         |                                  |                           |                             |                           |
| Dizziness/Hearing                    | 3                         |                                  |                           |                             |                           |
| Signs                                | 3                         |                                  |                           |                             |                           |
| Spirituality                         | 3                         |                                  |                           |                             |                           |
| Other health conditions              | 3                         |                                  |                           |                             |                           |
| Communication                        | 3                         |                                  |                           |                             |                           |
| Nursing Diagnosis                    | 3                         |                                  |                           |                             |                           |
| Sleep                                | 2                         |                                  |                           |                             |                           |
| Smoke                                | 2                         |                                  |                           |                             |                           |
| Immunity                             | 1                         |                                  |                           |                             |                           |
| Mortality                            | 1                         |                                  |                           |                             |                           |
| Hospital admission                   | 1                         |                                  |                           |                             |                           |
| End of life                          | 1                         |                                  |                           |                             |                           |

LTCF: long-term care facilities.
